# Supplementary material for: Volatiles of All Native Juniperus Species Growing in Greece—Antimicrobial Properties
Source: MDPI journal article supplement (doi:10.3390/foods12183506), 2023-09-20
Supplement: s1 [file s1]

## SUPPLEMENTARY FILE

### Volatiles of all native *Juniperus* species growing in Greece-Biological properties

Evgenia Fotiadou<sup>1</sup>, Evgenia Panou<sup>1</sup>, Konstantia Graikou<sup>1</sup>, Fanourios-Nikolaos Sakellarakis<sup>2</sup>, Ioanna Chinou<sup>1,\*</sup>

<sup>1</sup> Laboratory of Pharmacognosy and Chemistry of Natural Products, Faculty of Pharmacy, National and Kapodistrian University of Athens, Panepistimiopolis, Zografou, 15771, Athens, Greece; [eugenia.fot@gmail.com](mailto:eugenia.fot@gmail.com) (E.F.); [evgenia.panou39@gmail.com](mailto:evgenia.panou39@gmail.com) (E.P.); [kgraikou@pharm.uoa.gr](mailto:kgraikou@pharm.uoa.gr) (K.G.); [ichinou@pharm.uoa.gr](mailto:ichinou@pharm.uoa.gr) (I.C.)

<sup>2</sup> Society for the Protection of Prespa, Agios Germanos, 53077, Florina, Greece; [fansakell@gmail.com](mailto:fansakell@gmail.com) (F-N.S.)

\* Correspondence: [ichinou@pharm.uoa.gr](mailto:ichinou@pharm.uoa.gr);

Figure S1: Map with the collection areas of Greek Juniperus samples

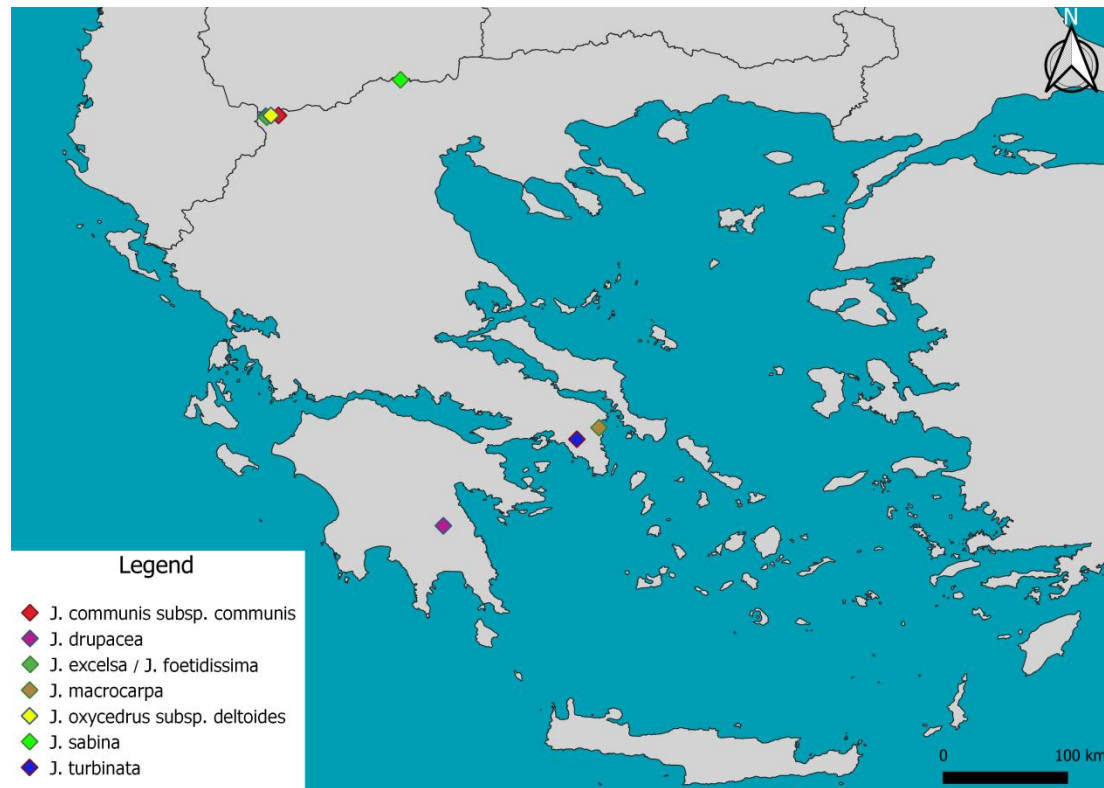

Table S1: Chemical composition of the Juniperus spp. essential oils from GC-MS analysis.

|     |                         | <i>KI</i> | <i>Je-<br/>leaves</i> | <i>Je-<br/>cones</i> | <i>Jf-<br/>leaves</i> | <i>Jf-<br/>cones</i> | <i>Jcc-<br/>leaves</i> | <i>Jcc-<br/>cones</i> | <i>Jm-<br/>leaves</i> | <i>Jm-<br/>cones</i> | <i>Jt-<br/>leave<br/>s</i> | <i>Jt-<br/>cones</i> | <i>Jod-<br/>aeria<br/>l</i> | <i>Jd-<br/>leaves</i> | <i>Jd-<br/>cone<br/>s</i> | <i>Js-<br/>leaves</i> | <i>Js-<br/>cones</i> |
|-----|-------------------------|-----------|-----------------------|----------------------|-----------------------|----------------------|------------------------|-----------------------|-----------------------|----------------------|----------------------------|----------------------|-----------------------------|-----------------------|---------------------------|-----------------------|----------------------|
| 1.  | $\alpha$ -Pinene        | 939       | 12.36                 | 30.59                | 15.65                 | 36.40                | 15.29                  | 22.50                 | 11.11                 | 12.07                | 26.55                      | 43.11                | 7.36                        | 5.72                  | 25.8                      | 6.35                  | 13.12                |
| 2.  | Camphene                | 955       | nq                    | 1.44                 | nq                    | nq                   | nq                     | nq                    | nq                    | nq                   | 1.72                       | 0.89                 | nq                          | nq                    | nq                        | nq                    | nq                   |
| 3.  | Thuja-2,4(10)-diene     | 956       | nq                    | nq                   | nq                    | nq                   | nq                     | nq                    | nq                    | nq                   | nq                         | 0.41                 | 0.79                        | nq                    | nq                        | nq                    | nq                   |
| 4.  | Verbenene               | 963       | nq                    | nq                   | nq                    | nq                   | nq                     | nq                    | nq                    | nq                   | nq                         | 0.82                 | nq                          | nq                    | nq                        | nq                    | nq                   |
| 5.  | Sabinene                | 977       | 6.53                  | nq                   | nq                    | nq                   | 13.50                  | 10.12                 | nq                    | nq                   | nq                         | nq                   | nq                          | nq                    | nq                        | 36.13                 | 36.87                |
| 6.  | $\beta$ -Pinene         | 980       | nq                    | 2.84                 | 0.58                  | 2.38                 | nq                     | nq                    | 0.20                  | 0.77                 | 1.55                       | 5.12                 | 0.38                        | nq                    | 1.5                       | nq                    | nq                   |
| 7.  | Myrcene                 | 993       | 1.67                  | 3.67                 | 1.34                  | 3.26                 | 3.15                   | 5.05                  | 0.46                  | 1.28                 | 3.14                       | 4.02                 | 3.15                        | 1.79                  | 2.86                      | 4.38                  | 4.33                 |
| 8.  | $\alpha$ -Phellandrene  | 1005      | nq                    | nq                   | nq                    | nq                   | 0.70                   | nq                    | nq                    | nq                   | nq                         | nq                   | nq                          | nq                    | nq                        | nq                    | 0.15                 |
| 9.  | $\delta$ -3-Carene      | 1014      | nq                    | nq                   | 5.92                  | 5.34                 | nq                     | nq                    | nq                    | nq                   | 9.19                       | 1.62                 | nq                          | 17.85                 | 9.37                      | nq                    | nq                   |
| 10. | $\alpha$ -Terpinene     | 1017      | nq                    | nq                   | nq                    | nq                   | nq                     | nq                    | nq                    | nq                   | nq                         | nq                   | nq                          | nq                    | nq                        | 2.60                  | 3.30                 |
| 11. | <i>o</i> -Cymene        | 1026      | nq                    | nq                   | nq                    | nq                   | nq                     | nq                    | nq                    | nq                   | nq                         | 1.32                 | nq                          | nq                    | nq                        | nq                    | nq                   |
| 12. | Limonene                | 1028      | 11.01                 | 9.89                 | 9.11                  | 7.57                 | nq                     | 6.38                  | 0.24                  | 0.75                 | 2.41                       | 2.03                 | 5.92                        | 30.01                 | 32.0                      | 2.79                  | 4.16                 |
| 13. | $\beta$ -Phellandrene   | 1030      | nq                    | nq                   | nq                    | nq                   | 2.00                   | 0.46                  | nq                    | nq                   | nq                         | nq                   | nq                          | nq                    | nq                        | nq                    | nq                   |
| 14. | (E)- $\beta$ -Ocimene   | 1056      | nq                    | 0.09                 | nq                    | nq                   | 0.30                   | nq                    | 0.08                  | nq                   | 0.05                       | nq                   | nq                          | nq                    | nq                        | 0.89                  | 0.20                 |
| 15. | $\gamma$ -Terpinene     | 1060      | 1.58                  | 2.59                 | 0.66                  | 2.59                 | 3.80                   | 1.03                  | nq                    | 0.05                 | 0.62                       | 0.17                 | 0.11                        |                       | 0.25                      | 4.30                  | 5.05                 |
| 16. | cis- Sabinene hydrate   | 1070      | nq                    | nq                   | nq                    | nq                   | nq                     | nq                    | nq                    | nq                   | nq                         | nq                   | nq                          | nq                    | nq                        | nq                    | 0.97                 |
| 17. | Terpinolene             | 1087      | 0.90                  | 3.13                 | 1.41                  | 3.21                 | 2.78                   | 1.78                  | 0.10                  | 0.65                 | 0.93                       | 0.74                 | 0.77                        | 0.67                  | 2.69                      | 1.98                  | 4.29                 |
| 18. | trans- Sabinene hydrate | 1098      | nq                    | nq                   | nq                    | nq                   | nq                     | nq                    | nq                    | nq                   | nq                         | nq                   | nq                          | nq                    | nq                        | nq                    | 0.49                 |
| 19. | Linalool                | 1104      | nq                    | nq                   | nq                    | nq                   | nq                     | nq                    | nq                    | nq                   | 0.27                       | nq                   | nq                          | nq                    | nq                        | 2.04                  | 0.43                 |
| 20. | $\alpha$ -Thujone       | 1107      | nq                    | nq                   | nq                    | nq                   | nq                     | nq                    | nq                    | nq                   | nq                         | nq                   | nq                          | nq                    | nq                        | nq                    | nq                   |
| 21. | $\beta$ -Thujone        | 1115      | 0.32                  | nq                   | nq                    | nq                   | nq                     | nq                    | nq                    | nq                   | nq                         | nq                   | nq                          | nq                    | nq                        | nq                    | nq                   |
| 22. | $\beta$ -Fenchol        | 1120      | nq                    | 0.13                 | nq                    | 0.32                 | nq                     | nq                    | nq                    | nq                   | nq                         | nq                   | nq                          | nq                    | nq                        | nq                    | nq                   |
| 23. | cis- p-menth-2 en-1-ol  | 1121      | nq                    | nq                   | nq                    | nq                   | nq                     | nq                    | nq                    | nq                   | nq                         | nq                   | nq                          | nq                    | nq                        | 0.44                  | 0.53                 |
| 24. | $\alpha$ -Campholenal   | 1128      | 0.31                  | 0.24                 | nq                    | 0.33                 | nq                     | 0.54                  | 0.15                  | 0.46                 | 0.08                       | 1.22                 | 1.27                        | nq                    | 0.03                      | nq                    | nq                   |
| 25. | cis-Verbenol            | 1138      | nq                    | 0.35                 | nq                    | nq                   | nq                     | nq                    | nq                    | nq                   | nq                         | nq                   | nq                          | nq                    | nq                        | nq                    | nq                   |
| 26. | trans-p-menth-2 en-1-ol | 1140      | nq                    | nq                   | nq                    | nq                   | nq                     | nq                    | nq                    | nq                   | nq                         | nq                   | nq                          | nq                    | nq                        | 0.31                  | 0.27                 |
| 27. | trans- Limonene oxide   | 1141      | nq                    | nq                   | nq                    | nq                   | nq                     | nq                    | nq                    | nq                   | nq                         | nq                   | nq                          | nq                    | 0.14                      | nq                    | nq                   |
| 28. | Pinocarveol             | 1142      | nq                    | nq                   | nq                    | 0.54                 | nq                     | 0.53                  | 0.20                  | 0.44                 | nq                         | 2.13                 | 1.56                        | nq                    | nq                        | nq                    | nq                   |
| 29. | Camphor                 | 1145      | 0.41                  | 1.43                 | 0.35                  | 1.10                 | 0.44                   | nq                    | nq                    | nq                   | nq                         | 1.02                 | nq                          | nq                    | nq                        | nq                    | nq                   |
| 30. | trans-Verbenol          | 1146      | nq                    | nq                   | nq                    | 1.12                 | 0.16                   | 0.78                  | nq                    | nq                   | nq                         | 1.14                 | nq                          | nq                    | nq                        | nq                    | nq                   |
| 31. | Citronellal             | 1153      | nq                    | nq                   | nq                    | nq                   | nq                     | nq                    | nq                    | nq                   | nq                         | nq                   | nq                          | nq                    | nq                        | 0.18                  | nq                   |
| 32. | Sabina ketone           | 1159      | 0.12                  | nq                   | nq                    | nq                   | 0.37                   | nq                    | nq                    | nq                   | nq                         | nq                   | nq                          | nq                    | nq                        | nq                    | nq                   |
| 33. | trans-Pinocamphone      | 1161      | nq                    | nq                   | nq                    | nq                   | nq                     | nq                    | nq                    | nq                   | nq                         | 0.42                 | nq                          | nq                    | nq                        | nq                    | nq                   |
| 34. | Pinocarvone             | 1164      | nq                    | nq                   | nq                    | nq                   | nq                     | nq                    | 0.08                  | nq                   | nq                         | nq                   | 0.37                        | nq                    | nq                        | nq                    | nq                   |
| 35. | Borneol                 | 1165      | nq                    | nq                   | nq                    | 0.23                 | nq                     | nq                    | nq                    | nq                   | nq                         | nq                   | nq                          | nq                    | 0.04                      | nq                    | nq                   |
| 36. | p-mentha-1,5-dien-8-ol  | 1168      | nq                    | 0.26                 | nq                    | 0.57                 | nq                     | 0.52                  | 0.24                  | 0.66                 | 0.12                       | 1.43                 | 3.02                        | 0.21                  | nq                        | nq                    | nq                   |
| 37. | Terpinen-4-ol           | 1174      | 2.18                  | 0.22                 | 0.13                  | 0.74                 | 6.26                   | 1.65                  | nq                    | 0.12                 | 0.17                       | 0.45                 | 0.57                        | 0.19                  | 0.30                      | 6.80                  | 7.54                 |
| 38. | p-Cymen-8-ol            | 1186      | nq                    | nq                   | nq                    | nq                   | 0.18                   | 0.13                  | nq                    | nq                   | nq                         | 0.36                 | nq                          | nq                    | nq                        | nq                    | nq                   |
| 39. | $\alpha$ -Terpineol     | 1188      | 0.19                  | 0.20                 | nq                    | 0.71                 | 0.75                   | 0.30                  | nq                    | nq                   | 0.28                       | 1.02                 | nq                          | 0.49                  | 0.07                      | 0.35                  | 0.29                 |

|     |                            |      |      |      |      |      |      |      |      |      |      |      |      |      |      |      |      |
|-----|----------------------------|------|------|------|------|------|------|------|------|------|------|------|------|------|------|------|------|
| 40. | Myrtenal                   | 1191 | nq   | nq   | nq   | nq   | nq   | nq   | 0.16 | nq   | nq   | nq   | nq   | nq   | nq   |      |      |
| 41. | cis-Piperitol              | 1194 | nq   | 0.16 | 0.13 |
| 42. | Myrtenol                   | 1195 | 0.17 | nq   | nq   | 0.24 | 0.41 | 0.26 | nq   | 0.12 | nq   | 0.41 | 0.64 | nq   | nq   | nq   | nq   |
| 43. | Verbenone                  | 1204 | nq   | nq   | nq   | nq   | 0.11 | 0.32 | 0.10 | 0.16 | nq   | 0.89 | 1.39 | nq   | nq   | nq   | nq   |
| 44. | trans-Piperitol            | 1206 | nq   | nq   | nq   | nq   | 0.21 | nq   |
| 45. | trans-Carveol              | 1221 | nq   | 0.17 | nq   | 0.18 | 0.17 | 0.22 | 0.05 | 0.14 | 0.08 | 0.54 | 1.75 | nq   | nq   | nq   | nq   |
| 46. | $\alpha$ -Fenchyl acetate  | 1220 | 0.20 | nq   |
| 47. | p-mentha-1(7),8-dien-2-ol  | 1231 | nq   | 0.14 | nq   | nq   | nq   | nq   |
| 48. | cis-Carveol                | 1237 | nq   | nq   | nq   | nq   | 0.04 | nq   | nq   | nq   | nq   | 0.03 | 0.32 | nq   | nq   | nq   | nq   |
| 49. | Citronellol                | 1238 | nq   | nq   | nq   | nq   | 0.05 | nq   | nq   | 0.03 | 0.94 | 0.05 | nq   | nq   | nq   | 0.68 | 0.09 |
| 50. | Carvone                    | 1242 | nq   | nq   | nq   | nq   | 0.07 | nq   | nq   | nq   | nq   | 0.06 | 0.83 | nq   | nq   | nq   | nq   |
| 51. | Carvacrol, methyl ether    | 1248 | nq   | nq   | nq   | 0.09 | nq   | nq   | nq   | 0.12 | nq   | 0.05 | nq   | nq   | nq   | nq   | 0.06 |
| 52. | Piperitone                 | 1253 | nq   | nq   | nq   | nq   | 0.11 | nq   | nq   | nq   | 0.09 | 0.33 | nq   | nq   | nq   | nq   | nq   |
| 53. | Linalyl acetate            | 1257 | nq   | 1.35 | nq   | nq   | nq   | nq   | 0.53 | 0.06 |
| 54. | Methyl citronellate        | 1261 | nq   | 5.48 | 1.63 |
| 55. | Myrtanol                   | 1262 | nq   | 0.19 | nq   | nq   | nq   | nq   |
| 56. | Isopulegyl acetate         | 1271 | nq   | 2.40 | 0.11 | nq   | nq   | nq   | nq   | nq   |
| 57. | (-)-Bornyl acetate         | 1278 | 0.17 | 0.60 | 0.10 | 0.36 | 0.43 | 0.74 | nq   | nq   | nq   | 0.05 | 0.06 | nq   | nq   | 0.10 | 0.22 |
| 58. | Sabinyl acetate            | 1290 | 0.78 | nq   | 0.10 | 0.20 |
| 59. | 2-undecanone               | 1300 | nq   | nq   | nq   | nq   | nq   | 0.10 | nq   |
| 60. | 2,4-E-Decadienol           | 1320 | 2.49 | nq   | 1.42 | nq   |
| 61. | Methyl geranate            | 1324 | nq   | 0.21 | 0.07 |
| 62. | $\delta$ -Elemene          | 1338 | nq   | nq   | nq   | nq   | 0.13 | 0.21 | nq   | nq   | nq   | 0.19 | nq   | nq   | nq   | 0.08 | 0.70 |
| 63. | $\alpha$ -Cubebene         | 1343 | 0.08 | nq   | nq   | nq   | 0.13 | 0.89 | 0.74 | 0.68 | nq   | nq   | 0.17 | 0.99 | 1.07 |      | 0.14 |
| 64. | $\alpha$ -Terpinyl acetate | 1346 | nq   | 2.55 | 1.38 | nq   | nq   | nq   | nq   | nq   |
| 65. | $\alpha$ -Ylangene         | 1373 | nq   | 0.06 | 0.14 | nq   | nq   |
| 66. | $\alpha$ -Copaene          | 1376 | 0.31 | nq   | 0.22 | nq   | 3.15 | 1.93 | 0.49 | 0.42 | 0.20 | 0.04 | 0.22 | 1.18 | 1.10 | 0.42 | 0.91 |
| 67. | $\beta$ -Bourbonene        | 1381 | nq   | nq   | nq   | nq   | 0.36 | nq   | 0.68 | nq   | 0.37 | nq   | 0.39 | 0.16 | nq   | nq   | nq   |
| 68. | $\beta$ -Cubebene          | 1385 | nq   | nq   | nq   | nq   | nq   | nq   | 0.72 | nq   | nq   | nq   | nq   | 0.13 | 0.19 | nq   | nq   |
| 69. | $\beta$ -Elemene           | 1389 | nq   | 0.19 |      | 0.17 | nq   | 3.83 | 0.76 | nq   | 1.25 | 0.66 | 0.10 | 0.17 | nq   | 0.16 | 0.61 |
| 70. | 7-epi-Sesquithujene        | 1392 | 0.37 | nq   | 0.40 | nq   |
| 71. | Longifolene                | 1406 | nq   | 0.21 | nq   |
| 72. | Z-Caryophyllene            | 1410 | nq   | 0.22 | nq   | nq   | nq   | nq   |
| 73. | $\beta$ -Funebrene         | 1414 | 3.25 | 2.85 | 5.33 | 2.61 | 2.88 | nq   | 1.45 | 1.60 | nq   |
| 74. | b-Caryophyllene            | 1419 | 1.87 | 2.51 | 2.86 | 1.48 | 2.39 | 1.21 | 3.37 | 2.73 | 5.42 | 1.97 | 6.02 | 1.75 | 1.57 | 0.27 | 0.68 |
| 75. | $\beta$ -Copaene           | 1430 | nq   | 0.38 | nq   | nq   | 0.35 | 0.42 | nq   | nq   |
| 76. | Widdrene (thujopsene)      | 1431 | 0.91 | 0.70 | 1.46 | 0.59 |      |      | 6.52 | 2.72 | nq   |
| 77. | $\gamma$ -Elemene          | 1436 | nq   | nq   | nq   | nq   | 1.63 | 3.91 | nq   | nq   | 0.49 | 1.75 | nq   | nq   | nq   | 0.21 | 1.45 |
| 78. | cis-Muurolo-3,5-diene      | 1446 | nq   | nq   | nq   | nq   | nq   | nq   | 1.65 | nq   | nq   | nq   | nq   | nq   | nq   | 0.07 | nq   |
| 79. | $\alpha$ -Humulene         | 1447 | 1.94 | 2.78 | 2.47 | 1.38 | 2.25 | 1.55 | 1.36 | 2.76 | 3.50 | 1.21 | 4.61 | 1.58 | 1.40 | 0.13 | 0.10 |
| 80. | trans-Muurolo-3,5-diene    | 1453 | nq   | 0.16 |      | 0.07 | nq   |
| 81. | Bicyclosesquiphellandrene  | 1454 | nq   | 0.74 | 0.24 | 0.17 | nq   |
| 82. | Thujopsadiene              | 1455 | nq   | nq   | nq   | nq   | nq   | nq   | 0.31 | nq   |
| 83. | E- $\beta$ -Farnesene      | 1462 | 0.92 | nq   | nq   | nq   | nq   | 0.42 | nq   | nq   | nq   | 0.06 | 0.10 | nq   | nq   | 0.04 | 0.09 |
| 84. | $\alpha$ -Acoradiene       | 1463 | nq   | 0.09 | nq   | 0.13 | nq   |
| 85. | cis-Cadina-1(6),4-diene    | 1463 | 1.06 | 0.27 | 1.18 | 0.17 | 0.12 | 0.24 | 1.19 | nq   |
| 86. | cis-Muurolo-4(14),5-diene  | 1465 | nq   | 0.23 | nq   | nq   | nq   | 0.2  | nq   | nq   |
| 87. | $\beta$ -Acoradiene        | 1469 | nq   | 0.37 | 0.87 | 0.35 | nq   |
| 88. | Dauca-5,8-diene            | 1472 | nq   | 0.20 | nq   | nq   | nq   | nq   |

|      |                                |      |       |       |       |       |      |      |       |       |       |      |       |      |       |      |      |      |
|------|--------------------------------|------|-------|-------|-------|-------|------|------|-------|-------|-------|------|-------|------|-------|------|------|------|
| 89.  | trans- Muurola-4(14),5-diene   | 1488 | nq    | nq    | nq    | nq    | nq   | nq   | nq    | nq    | nq    | nq   | nq    | nq   | nq    | 0.10 | 0.19 | nq   |
| 90.  | trans-Cadina-1(6),4-diene      | 1471 | nq    | nq    | nq    | nq    | nq   | nq   | nq    | nq    | nq    | nq   | nq    | nq   | nq    | nq   | 0.12 | 0.07 |
| 91.  | γ-Muurolene                    | 1478 | nq    | nq    | nq    | 0.18  | nq   | nq   | 0.77  | nq    | nq    | nq   | 0.61  | nq   | nq    | nq   | 0.23 | nq   |
| 92.  | Germacrene d                   | 1481 | 1.75  | 1.81  | 1.33  | 0.32  | 5.15 | 6.18 | 5.41  | 8.77  | 12.34 | 2.95 | 0.39  | 9.76 | 10.05 | 0.57 | 1.01 |      |
| 93.  | ar-Curcumene                   | 1485 | 0.08  | nq    | 0.11  | nq    | nq   | nq   | nq    | nq    | nq    | nq   | nq    | 3.51 | nq    | nq   | nq   |      |
| 94.  | β-Selinene                     | 1487 | nq    | 0.14  | nq    | 0.12  | 0.38 | 0.50 | nq    | 0.18  | 0.22  | 0.15 | 0.22  | nq   | 0.09  | nq   | nq   |      |
| 95.  | epi-Bicyclo sesquiphellandrene | 1488 | 1.00  | 0.06  | 0.75  | nq    | 0.13 | 0.23 | 1.48  | 1.23  | 0.14  | nq   | 0.34  | nq   | nq    | nq   | nq   |      |
| 96.  | Valencene                      | 1491 | nq    | nq    | nq    | nq    | nq   | nq   | nq    | nq    | nq    | nq   | 0.31  | nq   | nq    | nq   | nq   |      |
| 97.  | α-Selinene                     | 1493 | nq    | 0.11  | nq    | 0.11  | nq   | nq   | nq    | nq    | nq    | nq   | nq    | nq   | nq    | nq   | nq   |      |
| 98.  | epi-Cubebol                    | 1494 | nq    | nq    | nq    | nq    | nq   | nq   | 2.00  | nq    | nq    | nq   | nq    | nq   | nq    | 0.30 | 0.15 |      |
| 99.  | γ-Amorphene                    | 1495 | nq    | nq    | nq    | nq    | nq   | nq   | nq    | nq    | nq    | nq   | nq    | nq   | nq    | 0.68 | nq   |      |
| 100. | β-Alaskene                     | 1496 | 0.89  | 0.54  | 1.28  | 0.40  | nq   | nq   | nq    | nq    | nq    | nq   | nq    | 0.97 | nq    | nq   | nq   |      |
| 101. | Viridiflorene                  | 1498 | nq    | nq    | nq    | nq    | nq   | nq   | nq    | nq    | 0.80  | 0.22 | nq    | nq   | nq    | nq   | nq   |      |
| 102. | Bicyclogermacrene              | 1500 | nq    | nq    | nq    | nq    | 1.32 | 1.97 | nq    | nq    | nq    | nq   | nq    | nq   | nq    | nq   | nq   |      |
| 103. | α-Cuprenene                    | 1503 | nq    | nq    | 0.26  | nq    | nq   | nq   | nq    | nq    | nq    | nq   | nq    | nq   | nq    | nq   | nq   |      |
| 104. | α-Muurolene                    | 1504 | 0.54  | 0.51  | 1.01  | nq    | 0.60 | 0.73 | 10.56 | 6.38  | 0.74  | 0.32 | 2.62  | 0.72 | 0.46  | 0.68 | 0.47 |      |
| 105. | β-Himachalene                  | 1507 | nq    | 0.13  | nq    | 0.10  | nq   | nq   | 0.80  | nq    | nq    | nq   | nq    | nq   | nq    | nq   | nq   |      |
| 106. | α-Alaskene                     | 1511 | 1.74  | 0.86  | 1.80  | 0.91  | nq   | nq   | nq    | nq    | nq    | nq   | nq    | nq   | nq    | nq   | nq   |      |
| 107. | δ-Amorphene                    | 1514 | nq    | nq    | nq    | nq    | nq   | 0.12 | nq    | 0.13  | 0.15  | 0.04 | nq    | nq   | 0.22  | nq   | nq   |      |
| 108. | Cubebol                        | 1515 | nq    | nq    | 0.45  | nq    | nq   | nq   | nq    | nq    | nq    | nq   | nq    | nq   | nq    | nq   | nq   |      |
| 109. | trans-Calamenene               | 1522 | nq    | nq    | nq    | nq    | nq   | nq   | 0.55  | nq    | nq    | nq   | nq    | 0.35 | nq    | nq   | nq   |      |
| 110. | δ-Cadinene                     | 1524 | 2.64  | 0.56  | 1.42  | 0.21  | 4.50 | 3.90 | 8.39  | 6.83  | 2.18  | 0.76 | 1.24  | 1.55 | 2.04  | 3.26 | 2.08 |      |
| 111. | γ-Cadinene                     | 1525 | nq    | nq    | nq    | nq    | 0.70 | 0.92 | 3.12  | 2.62  | 0.95  | 0.22 | 1.10  | 3.63 | 1.71  | 0.95 | nq   |      |
| 112. | β-Sesquiphellandrene           | 1526 | nq    | nq    | nq    | 0.07  | nq   | nq   | nq    | nq    | nq    | nq   | nq    | nq   | nq    | nq   | nq   |      |
| 113. | (E)-γ-Bisabolene               | 1527 | 0.40  | 0.19  | 0.49  | 0.17  | nq   | nq   | nq    | nq    | nq    | nq   | nq    | nq   | nq    | nq   | nq   |      |
| 114. | trans-Cadina-1,4-diene         | 1529 | 0.39  | nq    | 0.46  | nq    | 0.12 | 0.25 | 1.04  | 0.80  | 0.22  | nq   | 0.10  | nq   | 0.13  | 0.09 | 0.06 |      |
| 115. | 10-epi-Cubebol                 | 1535 | nq    | nq    | nq    | nq    | nq   | nq   | nq    | 0.62  | nq    | nq   | nq    | nq   | nq    | nq   | nq   |      |
| 116. | α-Cadinene                     | 1539 | 0.10  | nq    | nq    | nq    | nq   | nq   | nq    | 0.21  | 0.17  | nq   | 0.08  | 0.21 | 0.18  | 0.34 | 0.10 |      |
| 117. | α-Calacorene                   | 1542 | nq    | nq    | nq    | nq    | 0.14 | nq   | 0.48  | 0.34  | nq    | nq   | 0.28  | 0.07 | nq    | nq   | nq   |      |
| 118. | Elemol                         | 1549 | nq    | nq    | nq    | nq    | nq   | nq   | nq    | nq    | 0.25  | 0.87 | nq    | nq   | nq    | 0.66 | 0.99 |      |
| 119. | β-Calacorene                   | 1561 | nq    | nq    | nq    | nq    | 0.05 | nq   | nq    | 0.18  | nq    | nq   | nq    | 0.07 | nq    | nq   | nq   |      |
| 120. | Germacrene B                   | 1564 | nq    | nq    | nq    | nq    | 2.18 | 5.13 | nq    | nq    | 0.90  | 1.92 | nq    | nq   | nq    | 0.26 | 1.57 |      |
| 121. | Nerolidol                      | 1571 | nq    | nq    | nq    | nq    | 0.40 | 0.25 | nq    | nq    | 0.21  | 0.18 | nq    | nq   | nq    | nq   | nq   |      |
| 122. | E-Nerolidol                    | 1572 | nq    | nq    | nq    | nq    | nq   | nq   | nq    | nq    | nq    | nq   | nq    | nq   | nq    | nq   | nq   | 0.08 |
| 123. | Germacrene d-4-ol              | 1575 | nq    | nq    | nq    | nq    | nq   | 1.21 | nq    | nq    | 0.25  | nq   | nq    | nq   | nq    | 2.92 | 1.03 |      |
| 124. | Spathulenol                    | 1577 | nq    | nq    | nq    | nq    | 1.68 | 0.95 | nq    | nq    | nq    | nq   | nq    | nq   | nq    | nq   | nq   |      |
| 125. | Caryophyllene oxide            | 1582 | nq    | nq    | nq    | nq    | 0.31 | 0.22 | 1.83  | 1.28  | 1.00  | 1.32 | 13.62 | 0.60 | 0.05  | nq   | nq   |      |
| 126. | allo-Cedrol                    | 1589 | 1.53  | 2.12  | 2.51  | 1.97  | 0.17 | 0.27 | 0.45  | 0.49  | 0.26  | 0.40 | 0.48  | nq   | nq    | nq   | nq   |      |
| 127. | Salvia-4(14)-en-1-one          | 1594 | nq    | nq    | nq    | nq    | nq   | nq   | nq    | nq    | 0.15  | nq   | nq    | nq   | 0.27  | nq   | nq   |      |
| 128. | α-Cedrol                       | 1601 | 22.40 | 19.46 | 27.73 | 17.79 | 0.20 | 0.17 | 12.80 | 14.12 | 0.10  | 0.15 | 0.80  | nq   | nq    | nq   | nq   |      |
| 129. | Humulene epoxide ii            | 1602 | nq    | 0.14  | nq    | 0.15  | 0.50 | 0.36 | nq    | 0.54  | 0.70  | 0.71 | 7.33  | 0.66 | 0.04  | nq   | nq   |      |
| 130. | β-Oplophenone                  | 1607 | nq    | nq    | nq    | nq    | nq   | nq   | nq    | nq    | nq    | nq   | nq    | nq   | nq    | 1.39 | 0.17 |      |
| 131. | 1,10-di-epi-Cubebol            | 1610 | nq    | nq    | nq    | nq    | 0.08 | 0.23 | nq    | nq    | nq    | nq   | nq    | nq   | nq    | 0.09 | 0.05 |      |
| 132. | 1-epi-Cubebol                  | 1623 | 0.94  | nq    | 0.99  | nq    | 0.26 | 0.22 | 3.98  | 2.39  | 0.13  |      | 0.75  |      | 0.04  | 0.14 | 0.08 |      |
| 133. | α-Acorenol                     | 1627 | nq    | 0.24  | nq    | 0.19  | nq   | nq   | nq    | nq    | nq    | nq   | nq    | nq   | nq    | nq   | nq   |      |
| 134. | γ-Eudesmol                     | 1630 | nq    | nq    | nq    | nq    | nq   | 0.08 | nq    | nq    | nq    | nq   | nq    | nq   | nq    | nq   | nq   | 0.08 |
| 135. | β-Acorenol                     | 1637 | 0.24  | 0.22  | 0.40  | 0.17  | nq   | nq   | nq    | nq    | nq    | nq   | nq    | nq   | nq    | nq   | nq   |      |

|      |                                               |      |           |           |           |           |           |           |           |           |           |           |           |           |           |           |           |
|------|-----------------------------------------------|------|-----------|-----------|-----------|-----------|-----------|-----------|-----------|-----------|-----------|-----------|-----------|-----------|-----------|-----------|-----------|
| 136. | epi- $\alpha$ -Cadinol                        | 1638 | 0.95      | 0.11      | nq        | nq        | 0.35      | nq        | nq        | nq        | 0.31      | nq        | 0.48      | 0.99      | 0.37      | nq        | nq        |
| 137. | epi- $\alpha$ -Murrrolol                      | 1641 | nq        | nq        | 0.32      | nq        | 0.87      | 0.62      | nq        | 0.67      | 0.22      | nq        | nq        | nq        | nq        | 1.92      | 0.68      |
| 138. | $\delta$ -Cadinol                             | 1646 | 0.18      | nq        | nq        | nq        | nq        | nq        | 0.93      | 0.84      | nq        | nq        | 0.44      | nq        | 0.07      | 0.33      | 0.16      |
| 139. | $\alpha$ -Eudesmol                            | 1653 | nq        | 0.08      |
| 140. | $\alpha$ -Cadinol                             | 1656 | 0.93      | nq        | nq        | nq        | 1.23      | 1.32      | nq        | 0.77      | 0.43      | nq        | 1.01      | 0.58      | 0.18      | 2.66      | 0.80      |
| 141. | Germacra-4(15),5,10(14)-trien-1- $\alpha$ -ol | 1681 | nq        | nq        | nq        | nq        | 0.19      | 0.14      | 0.80      | nq        | 0.59      | nq        | 0.25      | nq        | nq        | nq        | nq        |
| 142. | Shyobunol                                     | 1684 | nq        | nq        | nq        | nq        | 0.26      | 0.39      | nq        | nq        | 0.08      | nq        | nq        | nq        | nq        | 0.13      | 0.33      |
| 143. | 2,3-Dihydro-farnesol                          | 1697 | nq        | nq        | nq        | nq        | nq        |           | nq        | nq        | 1.37      | nq        | nq        | nq        | nq        | 0.12      | nq        |
| 144. | 2,6-Farnesol                                  | 1720 | nq        | nq        | nq        | nq        | 0.04      | 0.08      | nq        | nq        | nq        | nq        | nq        | 0.99      | nq        | 0.09      | nq        |
| 145. | 2,6-Farnesal                                  | 1743 | nq        | 0.05      | nq        | nq        | nq        | nq        | 0.32      | nq        |
| 146. | 14-oxy- $\alpha$ -muurolene                   | 1768 | nq        | 0.04      | nq        |
| 147. | 14-hydroxy- $\alpha$ -muurolene               | 1780 | nq        | 0.05      | nq        |
| 148. | $\beta$ -Bisabolene                           | 1789 | nq        | nq        | 0.07      | nq        |
| 149. | Pimaradiene                                   | 1949 | nq        | nq        | 0.08      | nq        | 0.29      | nq        | nq        | 0.54      | 0.08      | nq        | 0.22      | nq        | nq        | nq        | nq        |
| 150. | Sandaracopimara-8(14),15-diene                | 1969 | nq        | 0.03      | nq        | nq        |
| 151. | Manool oxide                                  | 1987 | 0.05      | 0.27      | nq        | nq        | nq        | nq        | nq        | 1.44      | nq        | nq        | 1.03      | 1.08      | nq        | nq        | nq        |
| 152. | 13-epi-manool oxide                           | 2011 | 0.09      | nq        | nq        | nq        | nq        | nq        | 3.55      | 0.03      | 0.22      | 0.12      | nq        | nq        | 0.05      | nq        | nq        |
| 153. | Abieta-8,12-diene                             | 2015 | nq        | 0.35      | 0.07      | nq        | nq        | nq        | nq        | 0.07      | 0.06      | 0.05      | nq        | nq        | nq        | 0.13      | nq        |
| 154. | Abietatriene                                  | 2056 | nq        | nq        | 0.09      | nq        | nq        | nq        | 0.39      | 0.18      | 0.07      | nq        | 2.03      | 0.45      | 0.43      | 0.03      | 0.02      |
| 155. | Abietadiene                                   | 2087 | 0.16      | 0.70      | 0.57      | nq        | 0.09      | nq        | 0.49      | 0.06      | 0.27      | 0.31      | 1.65      | 0.04      | 0.05      | 0.79      | 0.58      |
| 156. | Abieta-8(14),13(15)-diene                     | 2164 | nq        | 0.11      | nq        | 0.03      | nq        | nq        | nq        | 0.03      | nq        |
| 157. | Sandaracopimarinal                            | 2192 | nq        | 0.06      | nq        | nq        | nq        | 0.38      | nq        | 1.30      | 0.08      | 0.03      | 0.12      | 0.08      | 0.03      | nq        | nq        |
| 158. | Sandaracopimarinal                            | 2269 | nq        | 0.28      | nq        | nq        | nq        | nq        | nq        | 0.01      | nq        |
| 159. | 4-epi-abietal                                 | 2298 | 0.13      | 0.33      | 0.10      | nq        | nq        | nq        | nq        | nq        | 0.36      | 0.52      | nq        | nq        | nq        | nq        | 0.06      |
| 160. | Isopimarol                                    | 2310 | nq        | 0.04      | nq        | nq        | nq        | nq        | nq        | 0.15      |           |
| 161. | Abieta-7,13-dien-3-one                        | 2313 | nq        | 0.17      | nq        | nq        | nq        | nq        | nq        | nq        | 0.07      | 0.07      | nq        | nq        | nq        | 0.15      | 0.04      |
| 162. | Totarol                                       | 2314 | nq        | 0.08      | 0.07      | nq        | nq        |
| 163. | Trans-ferruginol                              | 2332 | nq        | 0.02      | nq        | nq        |
| 164. | Abietol                                       | 2401 | nq        | 0.03      | nq        | nq        | nq        | nq        | nq        |
|      |                                               |      | <b>48</b> | <b>48</b> | <b>41</b> | <b>43</b> | <b>59</b> | <b>54</b> | <b>45</b> | <b>53</b> | <b>64</b> | <b>60</b> | <b>54</b> | <b>39</b> | <b>45</b> | <b>61</b> | <b>56</b> |

*Je*= *Juniperus excelsa*, *Jf*= *Juniperus foetidissima*, *Jcc*= *Juniperus communis* subsp. *communis*, *Jm*= *Juniperus macrocarpa*, *Jt*= *Juniperus turbinata*, *Jod*= *Juniperus oxycedrus* subsp. *deltoides*, *Jd*= *Juniperus drupacea*, *Js*= *Juniperus sabina*; L= leaves, C= cones, Aerial = leaves and cones were not distinguished, KI= Kovats Index, nq= not quantified.
